# Supplementary material for: Agar and Chitosan Hydrogels’ Design for Metal-Uptaking Treatments
Source: MDPI journal article supplement (doi:10.3390/gels10010055), 2024-01-11
Supplement: s1 [file s1]

# Supplementary Materials

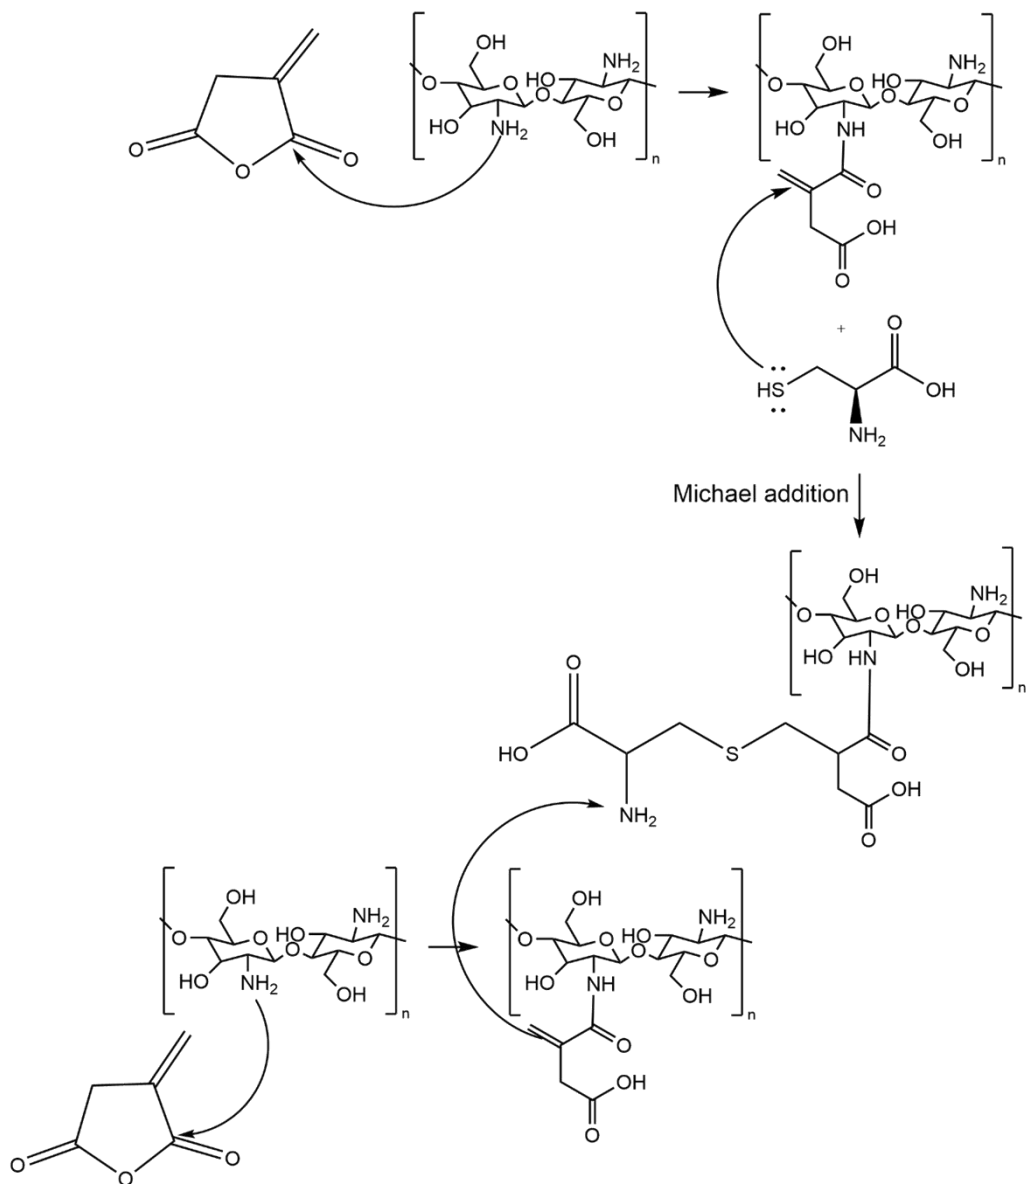

Figure S1: Possible reaction of chitosan with itaconic anhydride and L-cysteine.
